# Supplementary material for: A novel narrow-band blue-emitting phosphor with high efficiency and thermal stability for WLEDs and FEDs
Source: Royal Society of Chemistry journal article supplement (doi:10.1039/d3tc03420h), 2023-01-01
Supplement: d3tc03420h1.pdf [file d3tc03420h1.pdf]

## Supplementary Information for

### A Novel Narrow-Band Blue-Emitting Phosphor with High Efficiency and Thermal Stability for WLEDs and FEDs

Qiang Zhang<sup>a,b</sup>, Xin Ding<sup>c</sup>, Haoyang Wang<sup>b</sup>, Bin Liu<sup>a,\*</sup> and Yuhua Wang<sup>b,\*</sup>

<sup>a</sup> *School/Hospital of Stomatology, Lanzhou University, Lanzhou, PR China*

<sup>b</sup> *National and Local Joint Engineering Laboratory for Optical Conversion Materials and  
Technology of National Development and Reform Commission, Department of Materials  
Science, School of Materials and Energy, Lanzhou University, Lanzhou, PR China*

<sup>c</sup> *College of Materials Science and Engineering, Qingdao University, Ningxia Road  
NO. 308, Qingdao 266071, PR China*

Corresponding author's email: liubkq@lzu.edu.cn; [wyh@lzu.edu.cn](mailto:wyh@lzu.edu.cn)

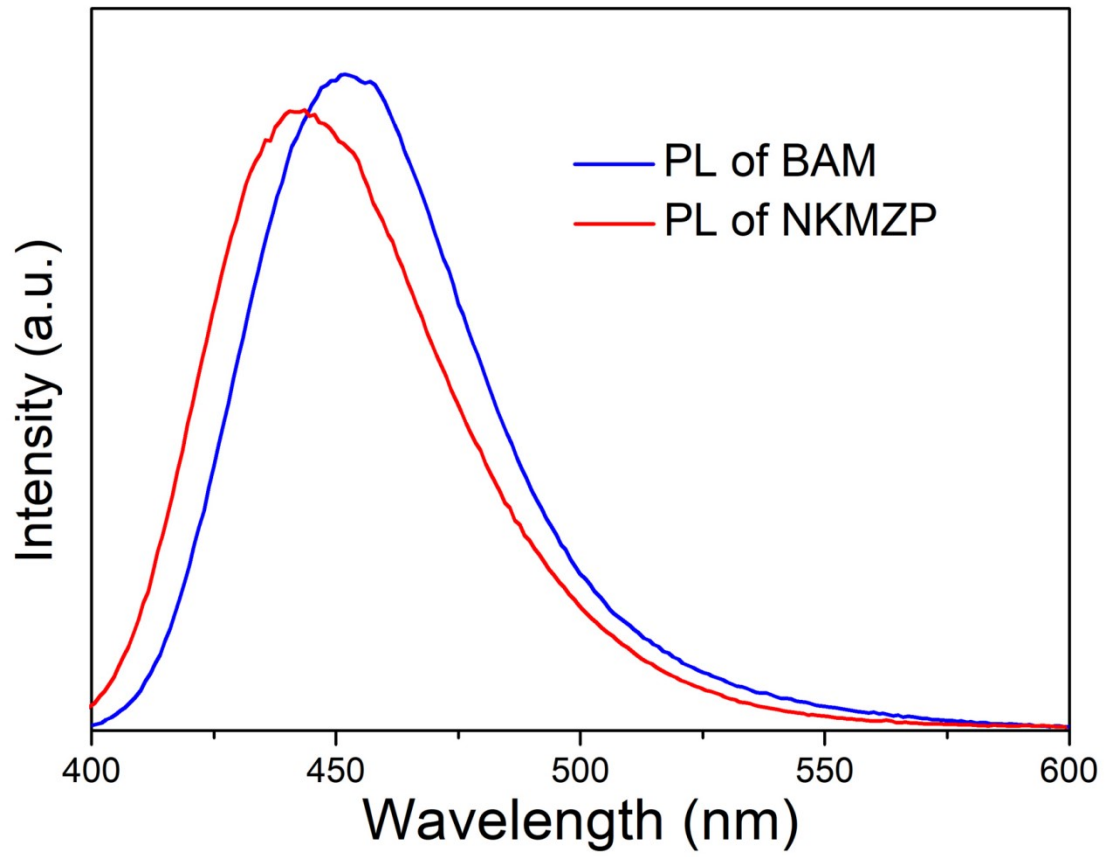

Fig. S1 The comparison of PL spectra of BAM: Eu<sup>2+</sup> and NKMZP: 0.02Eu<sup>2+</sup> phosphors under the excitation of 365 nm.

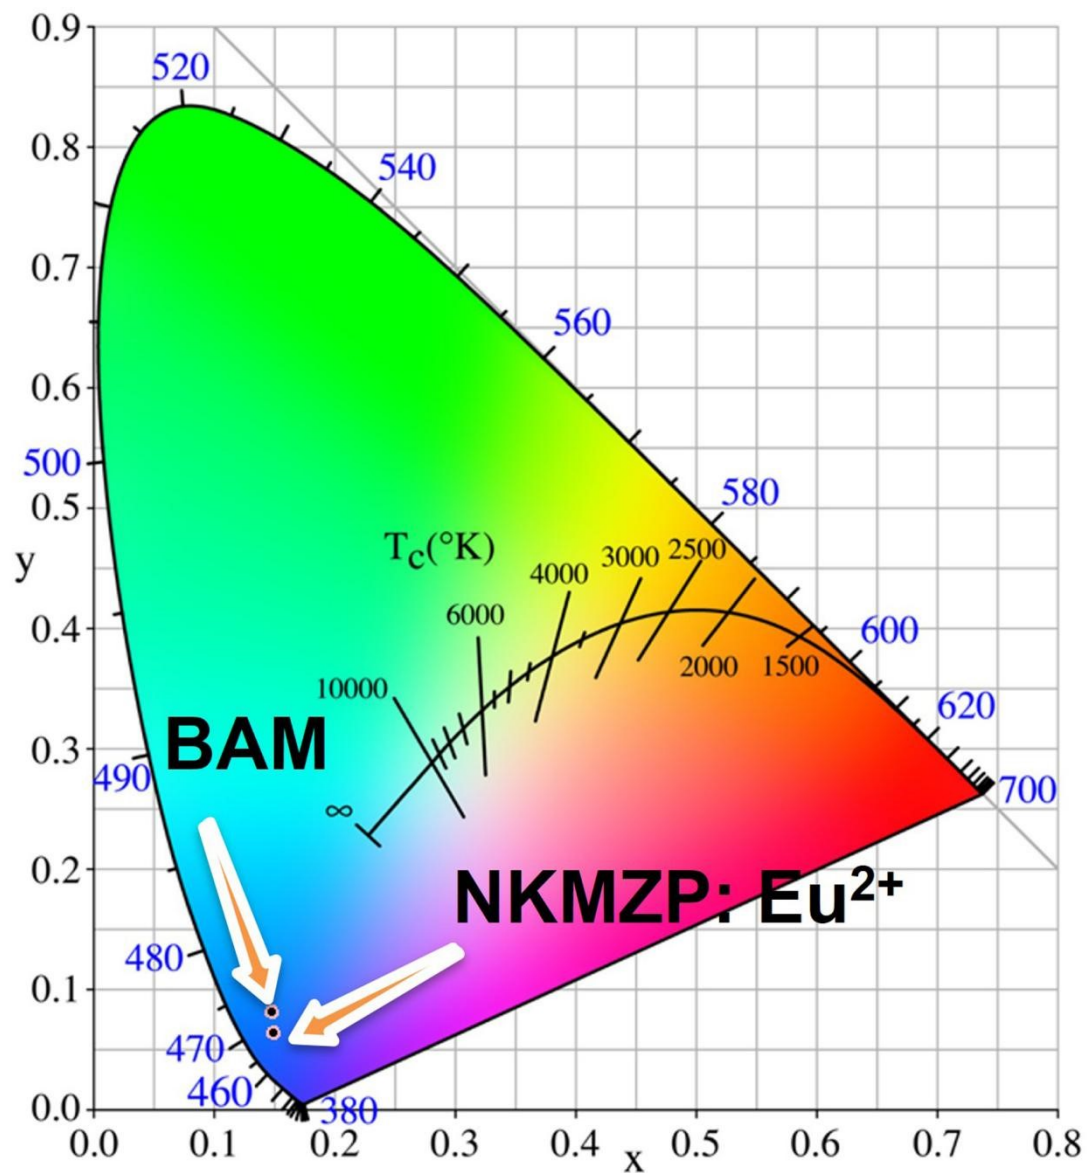

Fig. S2 The color coordinates of BAM and as-synthesized NKMZP: Eu<sup>2+</sup> phosphors.

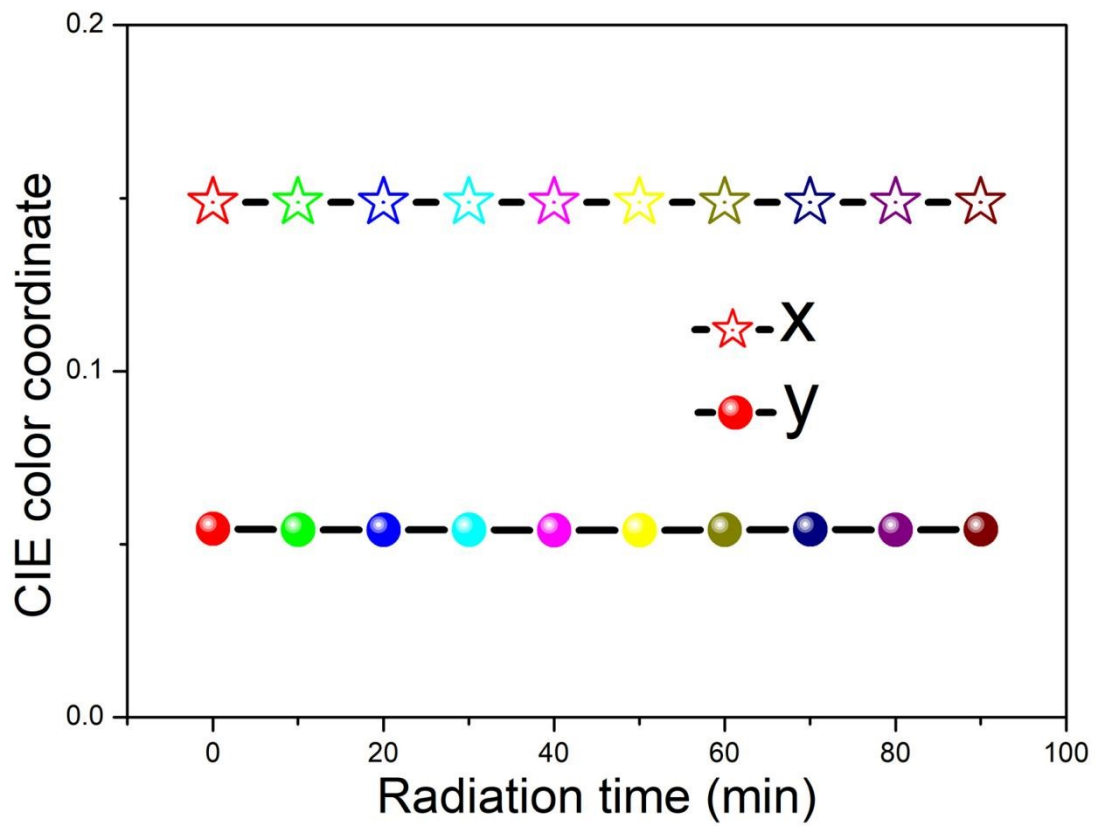

Fig. S3 chromaticity coordinate decay of NKMZP: 0.02Eu<sup>2+</sup> phosphor with the electron beam bombardment time (min).
